# Supplementary material for: An automated high-throughput sample preparation method using double-filtration for serum metabolite LC-MS analysis
Source: Royal Society of Chemistry journal article supplement (doi:10.1039/c9ay01137d), 2019-01-01
Supplement: c9ay01137d2.xlsx [file c9ay01137d2.xlsx]

## Sheet: Sheet1
Table S6. m/z, retention time, and peak areas (individual values, means, SDs, and RSDs) of 32 metabolites obtained from the function Predictive Metabolites Results of XCMS
Number	Metabolite	m/z	Rt (min)	Peak area (automated method)										Peak area (manual method)
				1	2	3	4	5	6	7	Mean	SD	RSD	1	2	3	4	5	6	7	Mean	SD	RSD
1	Xanthine	136.014	3.28	0	1817	524	306	0	1126	2715	926.857	1024.32	110.515	4651	5454	7801	6886	7023	7852	4775	6348.86	1370.62	21.5885
2	L-phenylalanine	150.067	22.48	17161	16488	13406	16666	17164	13111	17118	15873.4	1807.27	11.3855	30685	32416	42634	48291	40825	34881	38026	38251.1	6182.46	16.1628
3	3,4-dihydroxyphenylacetate	151.039	2.32	62004	54088	46439	55229	46632	46178	51265	51690.7	5893.11	11.4007	23556	28604	30080	30198	27466	31760	25541	28172.1	2873.25	10.1989
	3,4-dihydroxyphenylglycolaldehyde
	Pyridoxal
4	5'-α-carboxylmethylbutylhydroxychroman	172.098	3.78	21820	25558	30199	15398	29931	34107	17942	24993.6	6912.78	27.6582	1122	839	349	15082	542	1153	322	2772.71	5438.48	196.143
	Nornicotine
5	5-hydroxyindole acetaldehyde	176.071	3.56	14395	6909	19696	15026	15144	14240	23611	15574.4	5169.16	33.19	55117	76669	67762	64386	65372	56060	48680	62006.6	9358.82	15.0933
	Indole-3-acetate
	Trans-3'-hydroxycotinine
	Cotinine N-oxide
6	7-O-acetylsalutaridinol	187.099	4.27	19740	21629	18955	20624	20834	21174	21525	20640.1	977.55	4.73616	5225	6736	4460	4516	7062	7424	5685	5872.57	1215	20.6894
7	L-tryptophan	189.079	2.92	1114001	1187262	1291348	1180045	1313380	1051138	832503	1.13853e+06	163256	14.3393	5810	5394	3400	5935	2995	2660	3564	4251.14	1406.99	33.0968
8	4-hydroxy-4-(3-pyridyl)-butanoate	204.062	2.68	204287	204426	197186	220180	205294	190872	197272	202788	9287.01	4.57966	160958	163562	159410	155895	153676	135081	142333	152988	10485.6	6.85387
9	O-acetylcarnitine	205.132	3.19	79391	82526	70404	79978	76099	74080	78420	77271.1	4071.63	5.26928	51484	59849	60848	61303	55837	58635	47153	56444.1	5333.73	9.44958
10	3-methoxy-4-hydroxyphenyllactate	213.076	20.87	4532	4339	3870	5238	2742	3420	3559	3957.14	821.389	20.7571	10052	11858	8777	9103	8772	8432	8296	9327.14	1255.41	13.4597
11	5-methoxytryptophol	214.083	22.48	19662	13725	10648	12541	13307	13698	14177	13965.4	2771.67	19.8466	31036	35330	33372	36518	32298	39375	36820	34964.1	2901.77	8.29928
12	Thyronamine	231.124	17.23	11477	10301	9566	7996	7595	9179	8707	9260.14	1340.07	14.4714	0	399	0	952	414	354	1255	482	467.435	96.9783
13	Spermine	241.178	18.92	43112	40533	32002	56800	32263	40741	48060	41930.1	8712.75	20.7792	3485	1568	1508	597	852	346	1709	1437.86	1043.12	72.5468
14	4-hydroxy-2-nonenal-glutathione conjugate	244.101	22.47	6801	7636	8486	4570	8369	8030	10629	7788.71	1839.72	23.6203	31564	25245	32154	27514	21886	24438	24446	26749.6	3863.05	14.4415
15	2-trans-hexadecenal	261.218	27.68	819	1250	1270	0	0	549	0	555.429	575.624	103.636	11177	6460	7554	5752	5920	7443	7036	7334.57	1834.11	25.0064
16	Inosine	269.088	19.37	16777	16765	16315	18956	10666	13754	19843	16153.7	3112.49	19.2679	320	505	295	345	0	0	0	209.286	206.91	98.865
17	γ-L-glutamyl-L-cysteine	269.103	17.47	8474	11606	9313	8010	10798	11965	10727	10127.6	1541.25	15.2183	0	271	0	0	0	0	0	38.7143	102.428	264.575
18	(R)-mevalonatediphosphate	291.987	3.55	3144	1105	802	2098	1703	1587	3652	2013	1044.13	51.8694	6331	6256	5190	5936	7208	5201	6431	6079	715.895	11.7765
19	Protoporphyrinogen IX	296.15	18.35	29859	30228	31698	34343	23424	33226	36185	31280.4	4128.06	13.1969	5724	2054	823	1238	437	281	0	1508.14	1980.81	131.341
20	Protoporphyrinogen IX(2)	296.151	18.6	32749	29446	27794	36341	29874	31930	41089	32746.1	4598.12	14.0417	4786	1638	1092	0	356	280	825	1282.43	1640.87	127.95
21	4-hydroxy-2-nonenal-[L-Cys] conjugate	301.132	5.79	29643	23646	25400	32418	27855	38306	23059	28618.1	5414.62	18.9202	0	0	0	0	0	0	0	0	0
22	Aldosterone	344.174	18.99	6767	8656	12024	12078	10443	8838	13555	10337.3	2382.63	23.0489	3109	1957	1183	0	1091	340	290	1138.57	1096.27	96.2843
23	Prostaglandin E2	353.234	29.93	302	0	1516	0	0	0	304	303.143	553.565	182.609	8024	12297	11422	11716	6443	7333	9948	9597.57	2337.44	24.3545
	Thromboxane A2
	Lipoxin A4
	Prostaglandin-H2
24	β-nicotinate D-ribonucleotide	359.039	3.27	0	0	0	0	0	756	308	152	290.021	190.803	4740	5688	4217	4669	3645	4530	2385	4267.71	1033.2	24.2097
25	S-adenosyl-L-methionine	382.119	18.99	11105	10491	16213	15281	15395	16927	16388	14542.9	2626.32	18.0592	0	0	0	0	0	0	0	0	0
26	Sphingosylphosphorylcholine	450.336	20.45	14519	1184	282	9073	0	0	10534	5084.57	6118.24	120.33	55829	63898	65760	60431	59999	59902	50258	59439.6	5142.51	8.65166
27	(25R)-5β-cholestane-3α,7α,12α,26-tetraol	475.317	29.92	12239	10077	8156	8545	9350	7700	8510	9225.29	1542.06	16.7156	13585	15550	15152	14888	12114	14254	14453	14285.1	1150.94	8.05689
28	(25R)-5β-cholestane-3α,7α,12α,26-tetraol(2)	475.32	17.7	8347	15974	14590	8238	12636	13327	12256	12195.4	2942.83	24.1306	4845	1246	856	802	545	771	1328	1484.71	1507.03	101.503
29	all-trans-β-carotene	520.418	33.2	276	299	653	319	434	332	563	410.857	145.871	35.5042	17743	18920	17568	15773	21013	18345	13386	17535.4	2416.4	13.7801
30	D-myo-inositol (3,4,5,6)-tetrakisphosphate	538.891	2.46	5188	7125	4835	6287	4962	4666	4862	5417.86	925.957	17.0908	1753	2540	2438	2442	1541	1733	1825	2038.86	416.702	20.438
	D-myo-inositol (1,3,4,6)-tetrakisphosphate
	D-myo-inositol (1,4,5,6)-tetrakisphosphate
31	3,3',5-triiodothyronamine	630.796	17.1	5393	5343	7571	7671	6628	6347	5789	6391.71	961.389	15.0412	1894	1888	1380	2039	2299	1808	437	1677.86	612.713	36.5176
32	1D-myo-inositol 1,2,3,4,5,6-hexakisphosphate	677.898	17.42	19641	14965	24674	21546	20833	20414	10841	18987.7	4606.08	24.2582	0	0	0	1616	449	851	1394	615.714	686.387	111.478
